# Supplementary material for: Bioactives and their metabolites from Tetrastigma hemsleyanum leaves ameliorate DSS-induced colitis via protecting the intestinal barrier, mitigating oxidative stress and regulating the gut microbiota
Source: Royal Society of Chemistry journal article supplement (doi:10.1039/d1fo02588k), 2021-01-01
Supplement: d1fo02588k1.pdf [file d1fo02588k1.pdf]

**Table S1** Primer sequences used for RT-qPCR in colonic tissue.

| <b>Gene</b> | <b>primer Sequence (5'-3')</b> |
|-------------|--------------------------------|
| GAPDH       | F:ATGGGTGTGAACCACGAGA          |
|             | R:CAGGGATGATGTTCTGGGCA         |
| HO-1        | F:CCTCACTGGCAGGAAATCA          |
|             | R:TCGGGAAGGTAAAAAAGC           |
| NQO1        | F:GGCTGGTTTGAGAGAGTGCT         |
|             | R:GGAAGCCACAGAAACGCAG          |
| GCLC        | F:AAGCCTCCTCCTCCAAACTC         |
|             | R:GGGCCACTTTCATGTTCTCG         |
